# Supplementary material for: Correction of CCI cloud data over the Swiss Alps using ground-based radiation measurements
Source: Copernicus journal article supplement (doi:10.5194/amt-2018-18), 2018-01-31
Supplement: Supplementary file [file amt-2018-18-AC2-supplement.pdf]

# Review of "Correction of CCI cloud data over the Swiss Alps using ground-based radiation measurements"

doi:10.5194/amt-2018-18

Authors' response to anonymous referee 2

Fanny Jeanneret and co-authors

May 25th, 2018

We thank the reviewer for the review and presenting his/her suggestions. We have considered each one carefully, and answered below using these abbreviations:

**RC:** referee comment

**AR:** author's response

**AC:** author's changes in the manuscript (if appropriate)

**RC** Page 2, Line 8: These papers are still under review so 2017 needs to be changed to 2018.

**AR** Both are still under review and the DOIs correspond to the discussion papers (hence, 2017). The references will indeed be updated if the papers get approved before this one.

**RC** Page 2, Line 17: The author mentions shortwave and longwave measurements before mentioning passive. Also, microwave should be grouped with shortwave and longwave measurements. Finally, the next sentence uses 'latter ones' which refers to a group that contains active instruments and passive microwave when I believe the author intends for this second sentence to refer only to active instruments. For example, this would be clearer '. . . passive measurements of shortwave, longwave and microwave, as well as active instruments such as cloud radars and lidars. The latter ones ...'

**AR** Corrected, it is indeed simpler to understand now.

**RC** Page 3, Line 7: 'open-source' refers to source code. Another terminology should be used.

**AR** 'open-source' was replaced with 'open', here and in the introduction as well

**RC** Page 3, Line 8: 'the National' → 'the US National'

**AR** Corrected

**RC** Page 3, Line 9: 'from MODIS' → 'from the MODIS'

**AR** Corrected

**RC** Page 3, Line 9: ‘the National’ → ‘the US National’

**AR** Corrected

**RC** Page 3, Line 12: ‘3.7  $\mu\text{m}$ . For’ → ‘3.7  $\mu\text{m}$ -channel. For’

**AR** Corrected

**RC** Page 3, Line 26: A more complete list: “data such as atmospheric pressure, temperature and ozone, snow and ice cover, and land and sea surface temperature, all coming from ECMWF ERA Interim (...) along with surface reflectance from the MODIS MCD43C1 product (Schaaf et al., 2010).”

**AR** Corrected (see author’s correction in the next question).

**RC** Page 3, Line 26: Choosing the phase based on cost is not how it is done for Cloud cci. For all versions up to and including the version discussed in Stengel et al. [2017] a method based on that of Pavolonis and Heidinger [2004] and Pavolonis et al. [2005] was used. Newer versions use a neural network approach, much like the cloud mask. This brings up a very good question as cloud phase determination suffers from very similar problems as cloud detection. Have the authors thought about this in the context of high altitude regions?

**AR** The algorithm described initially in our paper is indeed not the one producing the data used. We apologize and corrected this (see below). Indeed, the cloud phase is affected, similarly as all the retrieved microphysical variables are affected by the false cloud detection problem. Figure 5 shows, for each variable as well as for the cloud phase, the impact of false cloud detection on the retrieved microphysics.

**AC** “Cloud properties are retrieved from the satellite-measured radiances using an optimal estimation approach, following the theoretical basis for inverse retrieval methods described in Rodgers [2004]. The algorithm, called Community Cloud retrieval for Climate (CC4CL), works in three steps: first, a neural network trained on co-located data from CALIPSO-CALIOP [Winker et al., 2009] is run on the measured radiances to determine if a cloud is present in the retrieval scheme or not. Then, the cloud phase is determined with a decision tree, as proposed by Pavolonis and Heidinger [2004] and Pavolonis et al. [2005]. Lastly, the retrieval is done using the measured radiances and some ancillary data such as atmospheric pressure, temperature and ozone, snow and ice cover, and land and sea surface temperature, all coming from ECMWF ERA Interim [Dee et al., 2011], along with surface reflectance from the MODIS MCD43C1 product [Schaaf et al., 2010]. The cloud top pressure, cloud optical thickness and cloud effective radius are returned directly by the optimal estimation, whereas the cloud top height, cloud top temperature, cloud albedo, liquid and ice water path are then inferred from them. For more information, the algorithm is described in detail in Sus et al. [2017] and McGarragh et al. [2017].”

**RC** Page 6, Line 15: ‘satellites’ → “satellite’s”

**AR** Corrected

**RC** Page 9, Line 3: ‘pyrgeometers, respectively pyranometers,’ → ‘pyrgeometers and pyranometers, respectively,’

**AR** Corrected

**RC** Page 9, Line 6: I don't think the cosine of the incidence angle weighting is required for the thermal instrument.

**AR** A pyrgeometer's response (longwave) is weighted by the cosine of the incidence angle, as specified in the manual of the CGR4 instruments (<http://www.kippzonen.com/Download/35/Instruction-Sheet-Pyrgeometers-CGR4>). It is correct that it is far from being as important as for the pyranometers (shortwave).

**RC** Page 9, Line 13: 'modified' → 'a modified'  
Page 9, Line 13: 'which have an' → 'which has an'

**AR** The sentence has been corrected this way:

**AC** "Older measurements from the ASRB network have been taken by modified Eppley PIR pyrgeometers, which have an observed uncertainty of  $3 \text{ Wm}^{-2}$ ."

**RC** Page 9, Line 17: 'come from' → 'comes from'

**AR** Corrected

**RC** Page 9, Line 25: Subscript 'sky' should not be italicized. Only subscripts that are variables should be italicized.

**AR** This is indeed correct, subscripts have been checked and corrected everywhere.

**RC** Page 9, Line 28: Need a comma after the equation. And, 'sky' should not be italicized.

**AR** Corrected

**RC** Page 9, Line 29: 'approximated to 1' → 'approximated to unity'

**AR** Corrected

**RC** Page 12, Line 11: Need a comma after the equation. And, subscripts 'e' and 'm' should not italicized.

**AR** Corrected

**RC** Page 12, Line 12: Subscripts 'e' and 'm' should not italicized.

**AR** Corrected

**RC** Page 12, Line 16: Need a comma after the equation.

**AR** Corrected

**RC** Page 14, Line 1: Is there a formal way to train this decision tree that the author can describe and/or give references for?

**AR** The decision tree is trained using recursive partitioning (Breiman, 1984). The information and reference have been added to the manuscript.

**AC** “The training is done by 10-fold cross-validation with random sampling, using recursive partitioning as presented in Breiman (1984).”

**RC** Figure 10 caption: ‘letters corresponds to’ → ‘letters correspond to’

**AR** Corrected

**RC** Page 17, Line 5: ‘twice larger’ → ‘twice as large’

**AR** Corrected

**RC** Table A1 caption: ‘temporally with MODIS’ → ‘temporally with the MODIS’

**AR** Corrected

## References

Leo Breiman. *Classification and regression trees*. Chapman & Hall/CRC, New York, N.Y., 1984. ISBN 978-1-351-46049-1. URL <http://lib.myilibrary.com?id=1043565>. OCLC: 1022760542.

D. P. Dee, S. M. Uppala, A. J. Simmons, P. Berrisford, P. Poli, S. Kobayashi, U. Andrae, M. A. Balmaseda, G. Balsamo, P. Bauer, P. Bechtold, A. C. M. Beljaars, L. van de Berg, J. Bidlot, N. Bormann, C. Delsol, R. Dragani, M. Fuentes, A. J. Geer, L. Haimberger, S. B. Healy, H. Hersbach, E. V. Hólm, L. Isaksen, P. Kållberg, M. Köhler, M. Matricardi, A. P. McNally, B. M. Monge-Sanz, J.-J. Morcrette, B.-K. Park, C. Peubey, P. de Rosnay, C. Tavolato, J.-N. Thépaut, and F. Vitart. The ERA-Interim reanalysis: configuration and performance of the data assimilation system. *Quarterly Journal of the Royal Meteorological Society*, 137(656):553–597, April 2011. ISSN 00359009. doi: 10.1002/qj.828.

Gregory R. McGarragh, Caroline A. Poulsen, Gareth E. Thomas, Adam C. Povey, Oliver Sus, Stefan Stapelberg, Cornelia Schlundt, Simon Proud, Matthew W. Christensen, Martin Stengel, Rainer Hollmann, and Roy G. Grainger. The Community Cloud retrieval for CLimate (CC4cl). Part II: The optimal estimation approach. *Atmospheric Measurement Techniques Discussions*, pages 1–55, October 2017. ISSN 1867-8610. doi: 10.5194/amt-2017-333.

Michael J. Pavolonis and Andrew K. Heidinger. Daytime Cloud Overlap Detection from AVHRR and VIIRS. *Journal of Applied Meteorology*, 43(5):762–778, May 2004. ISSN 0894-8763, 1520-0450. doi: 10.1175/2099.1. URL <http://journals.ametsoc.org/doi/abs/10.1175/2099.1>.

Michael J. Pavolonis, Andrew K. Heidinger, and Taneil Uttal. Daytime Global Cloud Typing from AVHRR and VIIRS: Algorithm Description, Validation, and Comparisons. *Journal of Applied Meteorology*, 44(6): 804–826, June 2005. ISSN 0894-8763, 1520-0450. doi: 10.1175/JAM2236.1. URL <http://journals.ametsoc.org/doi/abs/10.1175/JAM2236.1>.

Clive D. Rodgers. *Inverse methods for atmospheric sounding: theory and practice*. Number 2 in Series on atmospheric oceanic and planetary physics. World Scientific, Singapore, reprinted edition, 2004. ISBN 978-981-02-2740-1.

Crystal Barker Schaaf, Jichung Liu, Feng Gao, and Alan H. Strahler. Aqua and Terra MODIS Albedo and Reflectance Anisotropy Products. In Bhaskar Ramachandran, Christopher O. Justice, and Michael J. Abrams, editors, *Land Remote Sensing and Global Environmental Change*, volume 11, pages 549–561. Springer New York, New York, NY, 2010. ISBN 978-1-4419-6748-0 978-1-4419-6749-7. doi: 10.1007/978-1-4419-6749-7\_24. URL [http://link.springer.com/10.1007/978-1-4419-6749-7\\_24](http://link.springer.com/10.1007/978-1-4419-6749-7_24).

Oliver Sus, Martin Stengel, Stefan Stapelberg, Gregory McGarragh, Caroline Poulsen, Adam C. Povey, Cornelia Schlundt, Gareth Thomas, Matthew Christensen, Simon Proud, Matthias Jerg, Roy Grainger, and Rainer Hollmann. The Community Cloud retrieval for Climate (CC4cl). Part I: A framework applied to multiple satellite imaging sensors. *Atmospheric Measurement Techniques Discussions*, pages 1–42, October 2017. ISSN 1867-8610. doi: 10.5194/amt-2017-334.

David M. Winker, Mark A. Vaughan, Ali Omar, Yongxiang Hu, Kathleen A. Powell, Zhaoyan Liu, William H. Hunt, and Stuart A. Young. Overview of the CALIPSO Mission and CALIOP Data Processing Algorithms. *Journal of Atmospheric and Oceanic Technology*, 26(11):2310–2323, November 2009. ISSN 0739-0572, 1520-0426. doi: 10.1175/2009JTECHA1281.1. URL <http://journals.ametsoc.org/doi/abs/10.1175/2009JTECHA1281.1>.
